RESEARCH ARTICLE

# Effect of *CYP2B6* Gene Polymorphisms on Efavirenz Plasma Concentrations in Chinese Patients with HIV Infection

Xianmin Meng<sup>1,2</sup>, Kang Yin<sup>3</sup>, Jiangrong Wang<sup>3</sup>, Ping Dong<sup>2</sup>, Li Liu<sup>3</sup>, Yinzong Shen<sup>3</sup>, Li Shen<sup>3</sup>, Qing Ma<sup>3,4\*</sup>, Hongzhou Lu<sup>3\*</sup>, Weimin Cai<sup>1\*</sup>

**1** Department of Clinical Pharmacy and Pharmaceutical Administration, School of Pharmacy, Fudan University, Shanghai, China, **2** Department of Pharmacy, Shanghai Public Health Clinical Center, Shanghai, China, **3** Department of Infectious Disease, Shanghai Public Health Clinical Center, Shanghai, China, **4** Department of Pharmacy Practice, School of Pharmacy and Pharmaceutical Sciences, University at Buffalo, Buffalo, New York, United States of America

☯ These authors contributed equally to this work.

\* [luhongzhou@fudan.edu.cn](mailto:luhongzhou@fudan.edu.cn) (HL); [weimincai@fudan.edu.cn](mailto:weimincai@fudan.edu.cn) (WC); [qingma@buffalo.edu](mailto:qingma@buffalo.edu) (QM)

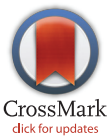

OPEN ACCESS

**Citation:** Meng X, Yin K, Wang J, Dong P, Liu L, Shen Y, et al. (2015) Effect of *CYP2B6* Gene Polymorphisms on Efavirenz Plasma Concentrations in Chinese Patients with HIV Infection. PLoS ONE 10(6): e0130583. doi:10.1371/journal.pone.0130583

**Academic Editor:** Weijing He, University of Texas Health Science Center San Antonio Texas, UNITED STATES

**Received:** August 11, 2014

**Accepted:** May 22, 2015

**Published:** June 24, 2015

**Copyright:** © 2015 Meng et al. This is an open access article distributed under the terms of the [Creative Commons Attribution License](https://creativecommons.org/licenses/by/4.0/), which permits unrestricted use, distribution, and reproduction in any medium, provided the original author and source are credited.

**Data Availability Statement:** Data are available from the Shanghai Public Health Clinical Center Ethics Committee in Shanghai, China for researchers who meet the criteria for access to confidential data.

**Funding:** This study was funded by the program for the 12th Five-year Plan, the People's Republic of China (NO: 2012ZX10001003), the 12th Five-Year Major New Drug Discovery Science and Technology Technology Platform Construction of anti-HIV drugs clinical evaluation (NO: 2012ZX09303013), the People's Republic of China, and Shanghai municipal

## Abstract

### Objectives

The main aim of this study was to investigate the effect of *CYP2B6* gene polymorphisms on efavirenz (EFV) plasma concentrations in Han Chinese patients with human immunodeficiency virus (HIV) infection.

### Methods

In total, 322 patients were recruited for study. EFV plasma concentrations at steady-state were determined using high-performance liquid chromatography. Genotyping for seven single nucleotide polymorphisms (SNPs), including 171+967C>A, 171+3212C>T, 171+4335T>C, 516G>T, 785A>G, 1295-913G>A, and \*1355A>G of *CYP2B6*, was performed using ligase detection reaction (LDR). SPSS 18.0 and Haploview 4.2 were applied for statistical analyses.

### Results

The average EFV concentration of patients was 2.35±2.09 µg/mL. Overall, 22% patients displayed EFV concentrations out of the therapeutic range of 1–4 µg/mL (13.1% < 1 µg/mL, 9.3% > 4 µg/mL). We observed significant association of 171+967C>A, 171+4335T>C, 516G>T, 785A>G and \*1355A>G with high plasma EFV levels ( $p < .01$ ). The predictive accuracy values of 171+4335CC, 516TT and 785GG for EFV concentrations > 4 µg/mL were 56.7%, 56.7% and 60%, respectively. We observed strong linkage disequilibrium for 171+967C>A, 171+4335T>C, 516G>T and 785A>G, resulting in five haplotypes. The frequencies of the five haplotypes (high to low) were as follows: CCTG (0.328), ACTG (0.280), ACCT (0.189), ATTG (0.186) and ACCG (0.017). The frequency of CCTG (0.524) in patients with EFV plasma concentrations < 1 µg/mL was significantly higher than that in other patient groups, while that of ACCT (0.733) was significantly higher in patients with

natural science foundation (14ZR1434900). QM was funded in part by NIMH K08MH098794.

**Competing Interests:** The authors have declared that no competing interests exist.

EFV concentrations  $> 4 \mu\text{g/mL}$ , relative to other patient groups. Average EFV concentrations of patients carrying ACTG (1.78  $\mu\text{g/mL}$ ), ACCT (7.50  $\mu\text{g/mL}$ ), and ATTG (1.92  $\mu\text{g/mL}$ ) haplotypes were markedly higher than those of patients carrying the CCTG haplotype. The predictive accuracy of ACCT for EFV  $> 4 \mu\text{g/mL}$  was 81%.

## Conclusions

Chinese patients administered standard doses of EFV require therapeutic drug monitoring or personalized medication management. Based on the current findings, we propose that 171+4335T>C, 516G>T, 785A>G and haplotype ACCT may be effectively used as genomic markers for EFV, which should aid in improving the efficacy of EFV-containing treatments and reduce the incidence of adverse reactions.

## Introduction

Efavirenz (EFV) is an important first-line drug for HIV-infected patients in China and widely used globally, particularly in developing countries, owing to its excellent efficacy [1]. Several studies have demonstrated considerable intra- and inter-patient variations in plasma concentrations and a narrow therapeutic window (1–4  $\mu\text{g/mL}$ ) of EFV. Moreover, the EFV plasma concentration is closely related to antiviral effects and adverse reactions [2–5]. Patients may be more likely to experience treatment failure or viral resistance at plasma concentrations  $< 1 \mu\text{g/mL}$ . Conversely, increased adverse reaction incidence, such as central nervous system toxicity, has been reported at EFV concentrations  $> 4 \mu\text{g/mL}$  [4, 6, 7].

EFV is mainly metabolized by the CYP P-450 isoenzyme, CYP2B6, in liver [8]. The *CYP2B6* gene located on chromosome 19 is highly polymorphic, with significantly different allele frequencies among various ethnic populations. Taking *CYP2B6* 516G>T (rs3745274) as an example, allele frequency varies from 0.18 to 0.35 in the Chinese population, and is maintained at a relatively high level [9–12]. Mutations of the *CYP2B6* gene affect the expression and enzyme activity of the translated protein, resulting in significant differences in the pharmacokinetics of EFV among individuals and races, in turn, leading to variations in efficacy and toxicity [2, 13, 14]. In recent years, researchers have investigated several SNPs of *CYP2B6*, including 516G>T, 785A>G (rs2279343), 983T>C (rs28399499), and 1459C>T (rs3211371), which are all known to be associated with EFV plasma concentrations [2, 15–21]. However, single SNP analysis may not provide sufficient accuracy to predict individual differences of EFV plasma concentrations. Considerable research attention has focused on attempting to integrate the effects of several SNPs that reduce the metabolic function of CYP2B6, with a view to increasing prediction accuracy [22, 23].

However, limited studies to date have examined the correlation between EFV plasma concentrations and *CYP2B6* gene polymorphisms in Han Chinese HIV-infected patients [11, 24]. An earlier report showed that the percentage of Han Chinese HIV-infected patients with EFV concentrations  $> 4 \mu\text{g/mL}$  was 28.6% after oral administration of EFV 600 mg once daily for at least two weeks [25]. The EFV concentrations of patients with 516 GT and TT genotypes were significantly higher than those of GG genotype patients [11, 24]. In clinical practice, EFV treatment has been withdrawn in many Han Chinese HIV-infected patients because of severe toxic reactions, which impact the efficacy of antiretroviral therapy and cause negatively affect to subsequent treatments. In the current study, we investigated the effects of *CYP2B6* gene

polymorphisms on EFV plasma concentrations in Han Chinese patients with HIV infection, with the aim of providing valuable data supporting the requirement for individualized medication.

## Materials and Methods

### Patients

In total, 322 Han Chinese HIV-infected outpatients receiving EFV combination antiretroviral therapy (cART) at Shanghai Public Health Clinical Center from January 2012 to January 2013 were enrolled in this study. All subjects, including 291 males and 31 females, were adults with an average age of 40 years (range: 18 to 78 years). Mean height and weight were recorded as  $171 \pm 6$  cm and  $63 \pm 9$  kg (BMI  $21.5 \pm 2.6$ ), respectively.

Subjects received EFV (600 mg once daily)-containing cART for at least 2 weeks and were advised not to take other medications that could reduce or induce isozymes of cytochrome P450, such as rifampicin. The average duration of cART was 17 months. The cART regimens included: (1) zidovudine (AZT, 300 mg twice daily), lamivudine (3TC, 300 mg daily) and EFV, (2) stavudine (d4T, 30 mg twice daily), 3TC and EFV, (3) tenofovir (TDF, 300 mg daily), 3TC and EFV, (4) TDF, lopinavir/ritonavir (LPV/r, 400/100 mg twice daily) and EFV, (5) d4T, TDF and EFV, (6) 3TC, LPV/r and EFV, (7) AZT, EFV and LPV/r. This study followed the principles of the Declaration of Helsinki, and approval was granted by the Ethics Committee of Shanghai Public Health Clinical Center. Written informed consent was obtained from all subjects.

Whole blood samples (5 mL) at 12–16 h post-dose were collected using EDTA anticoagulant tubes for determining the concentration of EFV and *CYP2B6* genotyping [26]. Plasma samples were heat-deactivated in a 56°C water bath for 60 min and stored at –80°C before analysis. Demographic and related data were collected, including age, weight, height, gender, cART regimens, dose and time of EFV administration, and sampling time.

### Quantification of EFV concentration

EFV plasma concentrations were determined using reverse-phase high-performance liquid chromatography (RP-HPLC) with ultraviolet (UV) detection based on a previously described protocol, with minor modifications [27]. HPLC was performed using Shimadzu LC-20A consisting of a column compartment CTO-20A, degasser DGU-20A5, pump CBM-20A, auto-sampler SIL-20AC, SPD-20AV UV detector, and YMC-Pack ODS-A column (C18, 150 mm  $\times$  4.6 mm, 5  $\mu$ m) with a guard column (ZORBAX Eclipse Plus-C18). The mobile phase comprised 62% acetonitrile, 38% 0.01 mol/L NaH<sub>2</sub>PO<sub>4</sub> buffer (containing 0.01 mol/L triethylamine, pH 5.2). Plasma proteins were precipitated with acetonitrile (containing 1.0  $\mu$ g/mL diazepam as the internal standard) before centrifugation at 15000 rpm for 6 min, and the supernatant injected directly into the machine. The UV detector was set at 247 nm and the injection volume as 20  $\mu$ L. The chromatogram was run for 7.5 min at a flow rate of 1.0 mL/min at 30°C. EFV and the internal standard (diazepam) were separated. Retention times for diazepam and EFV were 4.535 and 6.475 min, respectively. The linear range was 0.10–20  $\mu$ g/mL, with intraday/interday coefficient of variation of 1.9/7.2%, 2.4/2.2% and 2.6/2.2% at concentrations of 0.3, 3.0, 10.0  $\mu$ g/mL, respectively. The lower limit of quantitation was 89 ng/mL.

### SNP selection and genotyping

SNPs were selected primarily based on: 1) data on the *CYP2B6* gene among the Han Chinese population obtained from <http://www.ncbi.nlm.nih.gov/SNP> and filtered using Haploview 4.2.,

**Table 1. Primer sequences and lengths for PCR amplicons of SNPs.**

| Rs ID     | Polymorphisms | Location | Forward Primer (5'-3')   | Reverse Primer (5'-3')    | Product Size (bp) |
|-----------|---------------|----------|--------------------------|---------------------------|-------------------|
| rs2099361 | c.171+967C>A  | intron 1 | ACCTGTAGTTCAGCTACTT      | CACCATCATAATGGACTTGTC     | 302               |
| rs4803415 | c.171+3212C>T | intron 1 | TTTACCCATAAGTCTGCAT      | AATAATGGCTGCAAAAGGCATATTT | 364               |
| rs1872125 | c.171+4335T>C | intron 1 | GCCATCAATCAATAATACCTGA   | TGTATGTCTGGCTGAACCGGTGA   | 337               |
| rs3745274 | c.516G>T      | exon 4   | GTCAAATTAATCAGCCTCTCG    | GTCTGGTAGAACAAGTTCAGCA    | 382               |
| rs2279343 | c.785A>G      | exon 5   | AGGCAAGTTTACAAAACCTG     | CCCTCCCTAGTCTTTCTTCTTCC   | 255               |
| rs7260329 | c.1295-913G>A | intron 8 | CCTTCTGGGTATGCCAAAGGGATG | CTAAGGAGGCTTAAGGTTTGGTTAC | 222               |
| rs707265  | c.*1355A>G    | exon 9   | TATGTGATCTTTTGTGTCTGGTTG | GCATTGAGGTGAGAGAGGCA      | 374               |

doi:10.1371/journal.pone.0130583.t001

and 2) SNPs of *CYP2B6* that had a significant influence on EFV plasma concentrations in previous reports. In total, 7 SNPs of *CYP2B6* were selected for study, including 171+967C>A (rs2099361), 171+3212C>T (rs4803415), 171+4335T>C (rs1872125), 516G>T, 785A>G, 1295-913G>A (rs7260329), and \*1355A>G (rs707265). All genotyping experiments were performed by Shanghai BioWing Applied Biotechnology ([www.biowing.com.cn](http://www.biowing.com.cn)). Genomic DNA was isolated from peripheral blood using an AxyPrep-96 (AXYGEN) kit, and target DNA sequences amplified using a multiplex polymerase chain reaction (PCR) method. After PCR, genotyping was carried out using an oligonucleotide ligation detection reaction (LDR)-fluorescent microsphere assay. LDR conditions were as follows: 95°C for 2 min, 94°C for 30 s, and 50°C for 2 min (35 cycles). Fluorescent LDR products were differentiated using ABI Sequencer 377. The primers used are summarized in Table 1. Templates containing two alleles in each SNP were synthesized as positive controls. PCR-LDR findings were confirmed by sequencing the PCR products of 30 samples for each SNP.

### Statistical analysis

Continuous data, such as age, height, BMI, course of treatment of antiviral therapy and EFV concentration, were summarized as mean values ± SD or mean and 95% confidence interval (95% CI). Statistical analysis was performed using SPSS 18.0. Normality of EFV concentration data was assessed with the Kolmogorov–Smirnov method. Student’s t-test and single factor analysis of variance, Mann–Whitney and Kruskal–Wallis tests were employed for comparison. SNP frequencies were calculated using the observed numbers of alleles for each SNP. Genotypes were tested for Hardy–Weinberg equilibrium with the chi-square test of observed versus predicted genotype frequencies (from allele frequency). Haplotype structures and their frequencies were estimated from the observed number of genotypes using Haploview 4.2 [28]. Haplotype frequencies were examined with the Chi-square test. Analyses were two-sided, and the results considered significant at *p*-values below 0.05.

## Results

### Demographics, cART regimens and association with EFV plasma concentrations

The average EFV concentration of the 322 subjects was 2.35 ± 2.09 µg/mL (95% CI: 2.12–2.58 µg/mL), among which 78% (n = 250), 13% (n = 42) and 9% (n = 30) were within, below and above the proposed therapeutic window of 1–4 µg/mL, respectively. Demographics and cART regimens are summarized in Table 2. Univariate analysis revealed no significant effects of gender, age, BMI or cART regimens on EFV concentrations (*p*>0.05).

**Table 2. Demographic data and cART regimens and effects on EFV plasma concentrations.**

| Factors | Categories  | N (%)    | Mean ± SD (µg/mL) | 95%CI (µg/mL) | p     |
|---------|-------------|----------|-------------------|---------------|-------|
| Gender  | Male        | 291 (90) | 2.30±2.01         | 2.07–2.53     | 0.357 |
|         | Female      | 31 (10)  | 2.79±2.70         | 1.80–3.78     |       |
| Age     | <60         | 298 (92) | 2.36±2.08         | 2.12–2.59     | 0.374 |
|         | ≥60         | 24 (8)   | 2.27±2.15         | 1.37–3.18     |       |
| BMI     | BMI <25     | 288 (89) | 2.33±1.99         | 2.11–2.57     | 0.266 |
|         | BMI ≥25     | 34 (11)  | 2.45±2.80         | 1.47–3.43     |       |
| Regimen | AZT+3TC+EFV | 186 (58) | 2.36±2.14         | 2.05–2.67     | 0.143 |
|         | d4T+3TC+EFV | 82 (25)  | 2.45±2.30         | 1.94–2.96     |       |
|         | TDF+3TC+EFV | 48 (15)  | 2.07±1.53         | 1.63–2.52     |       |
|         | Others      | 6 (2)    | 2.90±1.09         | 1.75–4.05     |       |

BMI, body mass index; cART, combination antiretroviral therapy; AZT, zidovudine; 3TC, lamivudine; EFV, efavirenz; d4T, stavudine; TDF, tenofovir.

doi:10.1371/journal.pone.0130583.t002

### Allele and genotype frequencies of CYP2B6 gene SNPs and association with EFV plasma concentrations

All 7 SNPs of CYP2B6 conformed to Hardy–Weinberg equilibrium and were further analyzed with Haploview 4.2. The allele and genotype frequencies of SNPs and association with EFV concentrations are summarized in Table 3. Univariate analysis showed that 171+967C>A, 171+4335T>C, 516 G>T, 785A>G and \*1355A>G are significantly associated with high plasma EFV levels (p<0.01), but not 171+3212C>T or 1295-913G>A (p>.05) (Table 3; Fig 1). The genotype distribution of 30 patients with EFV concentrations > 4 µg/mL is summarized in Table 4. In the patient group with EFV concentrations > 4 µg/mL, 89.5% (17/19) displayed the 516 TT genotype, followed by 171+4335TT (81.0%, 17/21), 785AA (58.1%, 18/31), \*1355AA (19.2%, 23/120) and 171+967CC (18.1%, 27/149). Genotype frequencies of 516TT, 171+4335TT and 785AA in 30 subjects with EFV concentrations > 4 µg/mL were 56.7%, 56.7% and 60.0%, respectively.

### CYP2B6 haplotype frequency and association with EFV concentrations

Linkage disequilibrium analysis revealed that the D' value between any two SNPs of 171+967C>A, 171+3212C>T, 171+4335T>C, and 516G>T is 1. The r2 values between 171

**Table 3. Allele and genotype frequencies of CYP2B6 SNPs and their relationship with EFV plasma concentrations in 322 Chinese patients with HIV infection.**

| SNPs          | Alleles<br>(A1/A2) | Allele Frequencies |       | Genotype Frequencies–n (%) |           |           | Mean EFV Concentration (95%CI) -µg/mL |                 |                 | p     |
|---------------|--------------------|--------------------|-------|----------------------------|-----------|-----------|---------------------------------------|-----------------|-----------------|-------|
|               |                    | A1                 | A2    | A1/A1                      | A1/A2     | A2/A2     | A1/A1                                 | A1/A2           | A2/A2           |       |
| c.171+967C>A  | C/A                | 0.328              | 0.672 | 38(11.8)                   | 135(41.9) | 149(46.3) | 1.48(0.99–1.99)                       | 1.71(1.58–1.84) | 3.15(2.71–3.58) | <0.01 |
| c.171+3212C>T | C/T                | 0.814              | 0.186 | 215(66.8)                  | 94(29.2)  | 13(4.0)   | 2.47(2.16–2.78)                       | 2.12(1.79–2.46) | 2.02(1.57–2.48) | 0.932 |
| c.171+4335T>C | T/C                | 0.793              | 0.207 | 210(65.2)                  | 91(28.3)  | 21(6.5)   | 1.71(1.58–1.84)                       | 2.63(2.28–2.99) | 7.50(5.78–9.22) | <0.01 |
| c.516G>T      | G/T                | 0.811              | 0.189 | 219(68.0)                  | 84(26.1)  | 19(5.9)   | 1.72(1.59–1.85)                       | 2.68(2.30–3.06) | 8.12(6.49–9.76) | <0.01 |
| c.785A>G      | A/G                | 0.736              | 0.264 | 183(56.8)                  | 108(33.6) | 31(9.6)   | 1.79(1.65–1.94)                       | 2.26(1.95–2.58) | 5.95(4.50–7.40) | <0.01 |
| c.1295-913G>A | G/A                | 0.545              | 0.455 | 97(30.1)                   | 157(48.8) | 68(21.1)  | 3.03(2.40–3.66)                       | 2.12(1.89–2.36) | 1.90(1.70–2.10) | 0.792 |
| c.*1355A>G    | A/G                | 0.390              | 0.610 | 49(15.2)                   | 153(47.5) | 120(37.3) | 1.63(1.21–2.05)                       | 1.86(1.70–2.01) | 3.27(2.75–3.79) | <0.01 |

Abbreviations: 95% CI, 95% confidence interval.

doi:10.1371/journal.pone.0130583.t003

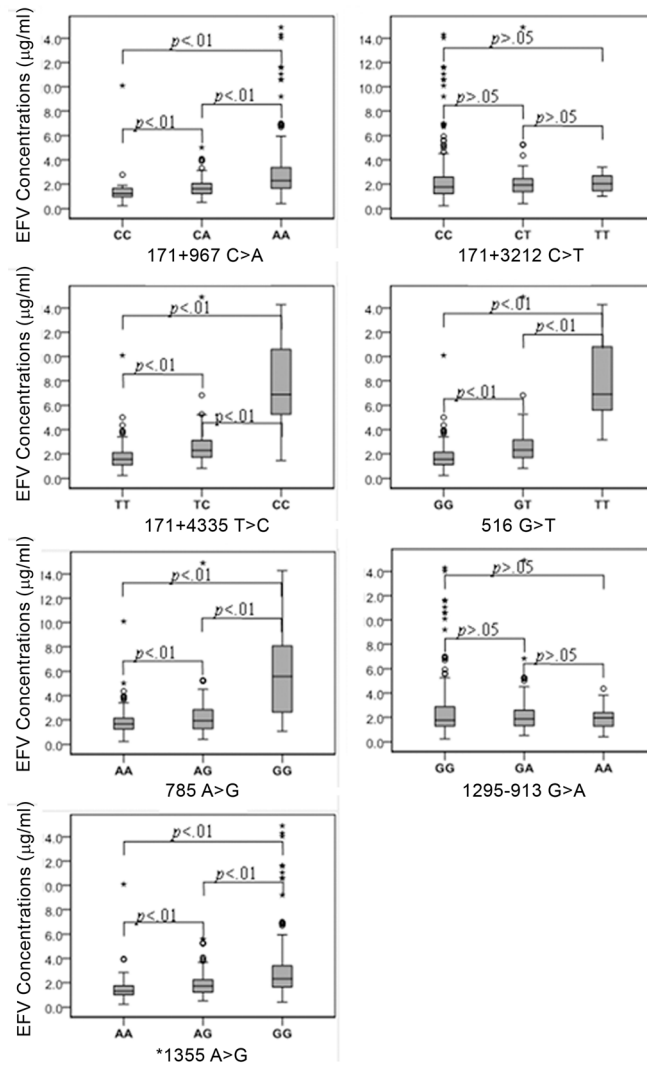

**Fig 1. Effects of 7 CYP2B6 SNPs on EFV plasma concentrations of HAN Chinese HIV-infected patients.** Values are presented as mean±SD. 171+967C>A, 171+4335T>C, 516G>T, 785A>G and \*1355A>G were significantly associated with high EFV plasma concentrations ( $p < .01$ ), but not 171+3212C>T and 1295-913G>A ( $p > .05$ ).

doi:10.1371/journal.pone.0130583.g001

+967C>A and 171+3212C>T, 171+967C>A and 171+4335T>C, and 171+967C>A and 516G>T were 0.112, 0.127, 0.114, respectively. The  $r^2$  values between 171+3212C>T and 171+4335T>C, and 171+3212C>T and 516G>T were 0.06 and 0.054, respectively, and that between 171+4335T>C and 516G>T was 0.898. These findings indicate strong linkage disequilibrium between the four SNPs (Fig 2). Five haplotypes were made up by the four SNPs. The haplotype with the highest frequency was CCTG (0.328), followed by ACTG (0.280), ACCT (0.189), ATTG (0.186), and ACCG (0.017). The cumulative frequency of the five haplotypes was 100%. The frequency of the CCTG haplotype (0.524) in patients with EFV plasma concentration < 1 µg/mL was significantly higher than that that in other patients, while the frequency of the ACCT haplotype (0.733) in patients with EFV concentrations > 4 µg/mL was significantly higher (Table 5). This finding indicates that patients carrying the CCTG haplotype



**Table 4. Genotypes and frequencies of CYP2B6 SNPs in patients with EFV plasma concentrations >4 µg/mL (n = 30).**

| A. Individual Data |             | Genotype   |             |        |        |          |
|--------------------|-------------|------------|-------------|--------|--------|----------|
| Patient #          | EFV (µg/mL) | 171+967C>A | 171+4335T>C | 516G>T | 785A>G | *1355A>G |
| 1                  | 4.087       | C/A        | C/T         | G/T    | A/G    | A/G      |
| 2                  | 4.0971      | A/A        | C/T         | G/T    | A/G    | G/G      |
| 3                  | 4.2348      | A/A        | C/T         | G/T    | A/G    | G/G      |
| 4                  | 4.3652      | A/A        | T/T         | G/G    | A/A    | G/G      |
| 5                  | 4.453       | A/A        | C/T         | G/T    | A/G    | G/G      |
| 6                  | 4.5176      | A/A        | C/T         | G/T    | A/G    | G/G      |
| 7                  | 4.6536      | A/A        | C/C         | T/T    | G/G    | G/G      |
| 8                  | 5.0084      | C/A        | T/T         | G/G    | A/A    | G/G      |
| 9                  | 5.2007      | A/A        | C/T         | G/T    | A/G    | G/G      |
| 10                 | 5.2288      | A/A        | C/T         | G/T    | A/G    | A/G      |
| 11                 | 5.253       | A/A        | C/C         | T/T    | G/G    | A/G      |
| 12                 | 5.2677      | A/A        | C/T         | G/T    | A/G    | A/G      |
| 13                 | 5.5801      | A/A        | C/C         | T/T    | G/G    | A/G      |
| 14                 | 5.5978      | A/A        | C/C         | T/T    | G/G    | A/G      |
| 15                 | 5.9313      | A/A        | C/C         | T/T    | G/G    | G/G      |
| 16                 | 6.6994      | A/A        | C/C         | T/T    | G/G    | G/G      |
| 17                 | 6.8276      | A/A        | C/T         | G/T    | G/G    | G/G      |
| 18                 | 6.879       | A/A        | C/C         | T/T    | G/G    | G/G      |
| 19                 | 6.9154      | A/A        | C/C         | T/T    | G/G    | G/G      |
| 20                 | 6.9984      | A/A        | C/C         | T/T    | G/G    | G/G      |
| 21                 | 9.199       | A/A        | C/C         | T/T    | G/G    | G/G      |
| 22                 | 10.096      | C/C        | T/T         | G/G    | A/A    | A/A      |
| 23                 | 10.5778     | A/A        | C/C         | T/T    | G/G    | G/G      |
| 24                 | 10.596      | A/A        | C/C         | T/T    | G/G    | G/G      |
| 25                 | 11.0563     | A/A        | C/C         | T/T    | G/G    | G/G      |
| 26                 | 11.5756     | A/A        | C/C         | T/T    | G/G    | G/G      |
| 27                 | 11.6234     | A/A        | C/C         | T/T    | G/G    | G/G      |
| 28                 | 14.03       | A/A        | C/C         | T/T    | G/G    | G/G      |
| 29                 | 14.285      | A/A        | C/C         | T/T    | G/G    | G/G      |
| 30                 | 14.892      | A/A        | C/T         | G/T    | A/G    | G/G      |

  

| B. Summary  |                 |           |      |           |      |           |      |             |             |
|-------------|-----------------|-----------|------|-----------|------|-----------|------|-------------|-------------|
| SNPs        | Alleles (A1/A2) | A1/A1 (n) |      | A1/A2 (n) |      | A2/A2 (n) |      | Ratio α (%) | Ratio β (%) |
|             |                 | Total     | High | Total     | High | Total     | High |             |             |
| 171+967C>A  | C/A             | 38        | 1    | 135       | 2    | 149       | 27   | 18.1        | 90.0        |
| 171+4335T>C | T/C             | 210       | 3    | 91        | 10   | 21        | 17   | 81.0        | 56.7        |
| 516G>T      | G/T             | 219       | 3    | 84        | 10   | 19        | 17   | 89.5        | 56.7        |
| 785A>G      | A/G             | 183       | 3    | 108       | 9    | 31        | 18   | 58.1        | 60.0        |
| *1355A>G    | A/G             | 49        | 1    | 153       | 6    | 120       | 23   | 19.2        | 76.7        |

**Notes:** High >4 µg/mL, Ratio α = >4 µg/mL (A2/A2)/total(A2/A2)×100%, Ratio β = >4 µg/mL (A2/A2)/30×100%

doi:10.1371/journal.pone.0130583.t004

have a greater likelihood of displaying EFV concentrations < 1 µg/mL while those carrying the ACCT haplotype have a high probability of exhibiting EFV concentrations > 4 µg/mL.

Data in [table 6](#) showed that ACTG (40.4%) was the most common haplotype in patients, followed by CCTG (32.0%), ATTG (14.9), ACCT (6.5%) and ACCG (2.2%). The average EFV concentrations of patients carrying ACTG (1.78 µg/mL), ACCT (7.50 µg/mL) and ATTG

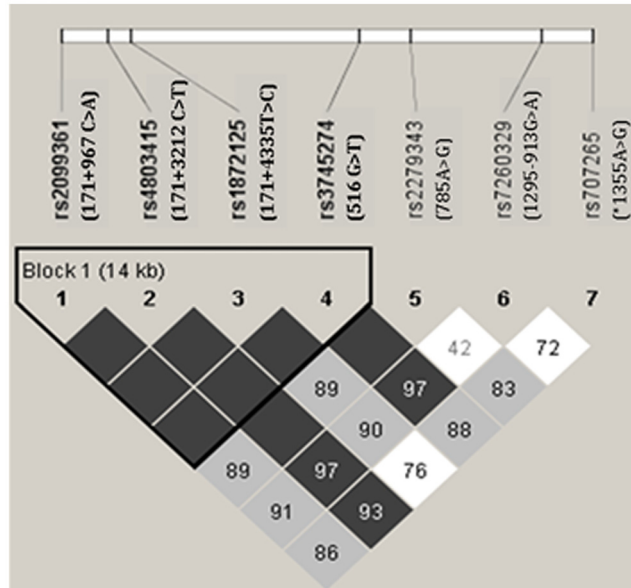

**Fig 2. LD Analysis of 7 SNPs of CYP2B6.** Dark grey squares: strong evidence of LD, light grey squares: uninformative, white squares: strong evidence of recombination. We observed strong linkage disequilibrium among the four SNPs (171+967 C>A, 171+3212 C>T, 171+4335 T>C, and 516 G>T).

doi:10.1371/journal.pone.0130583.g002

**Table 5. Haplotypes frequencies in 322 Chinese HIV-infected patients with different EFV plasma concentrations.**

| Haplotypes | Expected Frequencies (n) | Frequencies (n)   |                     |                   |
|------------|--------------------------|-------------------|---------------------|-------------------|
|            |                          | <1 µg/mL (n = 42) | 1–4 µg/mL (n = 250) | >4 µg/mL (n = 30) |
| CCTG       | 0.328 (106)*             | 0.524(22)         | 0.332(83)*          | 0.067(2)**        |
| ACTG       | 0.280 (90)               | 0.262(11)         | 0.290(73)           | 0.133(4)          |
| ACCT       | 0.189 (61)**             | 0.047(2)**        | 0.150(38)**         | 0.733(22)         |
| ATTG       | 0.186 (60)               | 0.143(6)          | 0.208(52)           | 0.067(2)          |
| ACCG       | 0.017 (5)                | 0.024(1)          | 0.020(5)            | 0.000(0)          |

Notes: (1) Haplotypes were constructed based on 4 SNPs (171+967C>A, 171+3212C>T, 171+4335T>C and 516G>T).  
(2) \*  $p < .01$ , \*\*  $p < .05$ .

doi:10.1371/journal.pone.0130583.t005

(1.92 µg/mL) haplotypes were significantly higher than those of patients carrying the CCTG haplotype (1.57 µg/mL). The predictive accuracy of ACCT for EFV concentrations > 4 µg/mL was 81%.

## Discussion

Numerous studies have focused on the relationship between CYP2B6 gene polymorphisms and EFV pharmacokinetics in HIV-infected patients of different ethnicities [29–32]. However, limited reports are available on the relationship between CYP2B6 SNPs and EFV concentrations in the Han Chinese HIV-infected population. The sample sizes of the two earlier published studies were relatively small [11, 25]. To our knowledge, the current study has provided the first comprehensive genetic analysis of CYP2B6 polymorphisms and their association with EFV concentrations in the largest Chinese HIV-infected patient cohort (n = 322). The average EFV concentration in this study cohort was 2.35 µg/mL, consistent with results from two other



**Table 6. Relationship between haplotypes and EFV plasma concentrations in 322 Chinese patients with HIV infection.**

| Haplotype | Cases-n (%) | Patients with different EFV concentration-n (%) |           |          | Mean EFV concentration –µg/mL (95%CI) | p                         |
|-----------|-------------|-------------------------------------------------|-----------|----------|---------------------------------------|---------------------------|
|           |             | <1 µg/mL                                        | 1–4 µg/mL | >4 µg/mL |                                       |                           |
| CCTG      | 103(32.0)   | 22(21.4)                                        | 79(76.7)  | 2(1.9)   | 1.57(1.36–1.79)                       | —                         |
| ACTG      | 130(40.4)   | 22(16.9)                                        | 106(81.5) | 2(1.5)   | 1.78(1.64–1.93)                       | = .004                    |
| ACCT      | 21(6.5)     | 0(0.0)                                          | 4(19.0)   | 17(81.0) | 7.50(5.78–9.22)                       | = 5.425×10 <sup>-11</sup> |
| ATTG      | 48(14.9)    | 4(8.3)                                          | 43(89.6)  | 1(2.1)   | 1.92(1.70–2.15)                       | = 3.280×10 <sup>-4</sup>  |
| ACCG      | 7(2.2)      | 1(14.3)                                         | 6(85.7)   | 0(0.0)   | 1.65(1.19–2.11)                       | = .279                    |

Notes: (1) Haplotypes were constructed based on 4 SNPs (171+967C>A, 171+3212C>T, 171+4335T>C and 516G>T). (2) Comparing with haplotype "CCTG". (3) Comparing among the 5 haplotypes,  $p = 2.87 \times 10^{-12}$ .

doi:10.1371/journal.pone.0130583.t006

studies on HIV-infected Chinese patients [11, 24], which were slightly higher than that reported from a study on Spanish patients (2.27 µg/mL) [33]. Despite the finding that EFV concentrations of the majority of patients (78%) were within the therapeutic window, 72 (22%) had suboptimal EFV concentrations, with 13% < 1 µg/mL and 9% > 4 µg/mL, implying a significant challenge of managing EFV-based regimens in HIV-infected Chinese patients, since EFV concentrations are associated with risk of treatment failure and toxicity, particularly neurotoxicity. It is unlikely that demographic factors, including age, gender and BMI, contribute substantially to the high inter-patient variability in EFV (Table 2). In terms of cART regimens, the most commonly used was AZT+3TC+EFV (58%), followed by d4T+3TC+EFV (25%) and TDF+3TC+EFV (15%). Though these regimens are common in China and other developing countries, no significant drug interactions with EFV of cART regimens used in this study have been reported, suggesting a limited impact on EFV metabolism and concentrations.

Genotype distributions and allele frequencies were in Hardy–Weinberg equilibrium for all 7 CYP2B6 SNPs analyzed. The observed allele frequencies of 171+967C>A, 171+3212C>T, 171+4335T>C, 516G>T, 785A>G, 1295-913G>A, and \*1355A>G were 0.672, 0.186, 0.207, 0.189, 0.264, 0.455, and 0.610, respectively, consistent with earlier reports on Chinese populations [9–12]. In particular, the allele frequencies of 516G>T (0.189) and 785A>G (0.264) were similar to those recorded for other Asian populations, such as Japanese and Korean [23, 34], but lower than that in African populations [17, 18]. Five SNPs, including 171+967C>A (intron 1), 171+4335T>C (intron 1), 516G>T (exon 4), 785A>G (exon 5), and 1295-913G>A (exon 9), were significantly associated with EFV concentrations, suggesting that variations in splicing, coding, and subsequent CYP2B6 enzymatic activity affect EFV metabolism. Notably, variants with decreased enzymatic activity lead to elevated EFV concentrations, as observed in the present study. Associations between 516G>T and EFV pharmacokinetics have been documented in a number of recent studies. Our findings on allele frequency and different genotypes, 68% (GG), 26% (GT) and 6% (TT), were similar to previous observations. Among 19 patients with 516TT, 89.5% (n = 17) had EFV concentrations above 4 µg/mL, with an average of 8.12 µg/ml, ~5- and 3-fold higher than those with 516GG (1.68 µg/mL) and 516GT (2.56 µg/mL), respectively, suggesting a significant impact of 516G>T to EFV metabolism among the Chinese population, consistent with previous findings in Asian and other populations [10, 12, 32, 33]. In addition, 171+4335T>C and 785A>G were significantly associated with mean EFV concentration, which was 2–3 and 3–4 times higher in patients with the homozygous variant genotype than those in the heterozygous and wild-type groups, respectively. The percentages of patients homozygous for 171+4335T>C and 785A>G with EFV concentrations > 4 µg/mL were 81% and 58%, respectively. To our knowledge, this is the first report of an association of 171

+4335T>C with EFV concentrations within the Chinese population, which appears as important as 516 G>T. Since the 171+4335T>C polymorphism is common among Chinese and Asian populations, its impact on EFV concentrations warrants further investigation. The high probability of EFV concentrations above 4 µg/mL in relation to homozygous 171+4335T>C (81.0%), 516G>T (89.5%) or 785A>G (58.1%) (Table 4), and high respective predictive accuracy of 56.7%, 56.7% and 60% support the potential utility of these markers to guide dose selection and adjustment of EFV therapy. Although 90% subjects (27/30) with homozygote (A/A) at 171+967C>A had EFV concentrations greater than 4 µg/ml, a ratio higher than 57% (17/30) with 516T/T, they only accounted for 18% among a total of 149 subjects with 171+967A/A whereas the 17 subjects with 516T/T accounted for 90% of the total (n = 19). Thus, the overall prediction potential of 516G>T, 51% (90%\*57%), was remarkably higher than that of 171+967C>A, 16% (18%\*90%), suggesting a more important role of 516G>T in predicting EFV concentrations.

Haplotype analysis collectively evaluates the interactions of multiple SNPs, leading to a decrease in the metabolic function of CYP2B6. In theory, haplotype accuracy may be higher, compared with single SNPs in predicting EFV pharmacokinetics [22]. To our knowledge, this study represents the first report of relationship between haplotype and EFV concentrations in Chinese patients. Linkage disequilibrium among 171+967C>A, 171+3212C>T, 171+4335T>C and 516G>T was observed, resulting in five haplotypes among which CCTG had the highest frequency (0.328), followed by ACTG (0.280), ACCT (0.189), ATTG (0.186) and ACCG (0.017). The CCTG haplotype was associated with low EFV concentrations (<1 µg/mL), with a calculated a frequency of 0.524 that is significantly higher than other haplotypes ( $p < .05$ ), suggesting predictive value of EFV concentrations <1 µg/mL. Conversely, the high ACCT haplotype frequency (0.733) among patients with EFV concentrations > 4 µg/mL suggests an association with high EFV concentrations.

DNA of patients is composed of diplotypes. It was difficult for us to measure the diplotype for each patient accurately, due to lack of proper equipment. We are able to determine diploypes of patients, such as CCTG/CCTG, CCTG/ACTG, if the 4 SNPs (171+967 C>A, 171+3212 C>T, 171+4335 T>C, 516 G>T) are all homozygous or only one in four is a heterozygote. However, it is impossible to determine the type of diplotype for patients with two or more heterozygotes of the above SNPs. Based on genotype data of the four SNPs, we calculated that the number of patients with CCTG, ACTG, ACCT, ATTG, and ACCG haplotypes are 103 (32.0%), 130 (40.4%), 21 (6.5%), 48 (14.9%) and 7 (2.2%), respectively. The average EFV concentration of patients carrying ACCT (7.50 µg/mL) was significantly higher than those of patients carrying the CCTG haplotype (1.57 µg/mL). Moreover, the predictive accuracy of ACCT (81%) was relatively higher than that of single SNPs, such as 171+4335T>C (57%), 516G>T (57%) and 785A>G (60%).

Our current study has potential limiting and confounding factors commonly associated with cross-sectional study design. Despite the relatively large sample sizes and multiple SNPs, drug concentration sampling and the nature of combination antiretroviral therapy may interfere with data interpretation. However, the effects of non-compliance and inter-individual variability may be mitigated by selection of patients stabilized with EFV for at least 2 weeks. In addition, the sample collection window was set between 12 and 16 h after EFV administration, which is a relatively large time range [26]. A large proportion of Chinese patients with HIV infection have co-infections with hepatitis B or C virus and tuberculosis (TB). Combinations of drugs may significantly affect the EFV concentration [35]. Indeed, some of the participants (~10%) in this study were co-infected with HIV/TB. The impact of co-infection and concurrent medications for TB, *i.e.*, rifampin, warrants further investigation.

In summary, a large proportion of the Chinese patients in our study (~22%) displayed EFV concentrations out of the therapeutic window, suggesting potentially high risk of treatment failure or toxicity. Significant associations between SNPs in *CYP2B6* and EFV concentrations were evident, particularly for 171+4335T>C, 516G>T, and 785A>G. Haplotype analysis suggested strong association of CCTG or ACCT and EFV concentrations. Therefore, personalization of medical care may become feasible if these genomic markers are validated and incorporated in EFV-containing treatments in the future. This would improve the rationality of EFV dosage selection, which may not only maintain efficacy but also reduce the incidence of adverse reactions as well as treatment costs [36–38].

## Acknowledgments

We thank all the patients and research assistants for their cooperation.

## Author Contributions

Conceived and designed the experiments: XM QM HL WC. Performed the experiments: XM KY JW LL YS LS. Analyzed the data: XM KY QM HL WC. Contributed reagents/materials/analysis tools: XM PD. Wrote the paper: XM KY QM HL WC.

## References

1. Bock P, Fatti G, Grimwood A. Comparing the effectiveness of efavirenz and nevirapine for first-line anti-retroviral therapy in a South African multicentre cohort. *International health*. 2013; 5(2):132–8. doi: [10.1093/inthealth/ih002](https://doi.org/10.1093/inthealth/ih002) PMID: [24030113](https://pubmed.ncbi.nlm.nih.gov/24030113/).
2. Aurrpibul L, Chotirosniramit N, Sugandhavesa P, Kosashunhanan N, Thetket S, Supindham T, et al. Correlation of CYP2B6-516G > T Polymorphism with Plasma Efavirenz Concentration and Depression in HIV-Infected Adults in Northern Thailand. *Current HIV research*. 2012; 10(8):653–60. PMID: [22950382](https://pubmed.ncbi.nlm.nih.gov/22950382/).
3. Gutierrez F, Navarro A, Padilla S, Anton R, Masia M, Borrás J, et al. Prediction of neuropsychiatric adverse events associated with long-term efavirenz therapy, using plasma drug level monitoring. *Clin Infect Dis*. 2005; 41(11):1648–53. PMID: [16267739](https://pubmed.ncbi.nlm.nih.gov/16267739/).
4. Marzolini C, Telenti A, Decosterd LA, Greub G, Biollaz J, Buclin T. Efavirenz plasma levels can predict treatment failure and central nervous system side effects in HIV-1-infected patients. *Aids*. 2001; 15(1): 71–5. Epub 2001/02/24. PMID: [11192870](https://pubmed.ncbi.nlm.nih.gov/11192870/).
5. Yimer G, Amogne W, Habtewold A, Makonnen E, Ueda N, Suda A, et al. High plasma efavirenz level and CYP2B6\*6 are associated with efavirenz-based HAART-induced liver injury in the treatment of naive HIV patients from Ethiopia: a prospective cohort study. *The pharmacogenomics journal*. 2012; 12(6):499–506. doi: [10.1038/tpj.2011.34](https://doi.org/10.1038/tpj.2011.34) PMID: [21862974](https://pubmed.ncbi.nlm.nih.gov/21862974/).
6. Kappelhoff BS, van Leth F, Robinson PA, MacGregor TR, Baraldi E, Montella F, et al. Are adverse events of nevirapine and efavirenz related to plasma concentrations? *Antiviral therapy*. 2005; 10(4): 489–98. PMID: [16038474](https://pubmed.ncbi.nlm.nih.gov/16038474/).
7. Mukonzo JK, Okwera A, Nakasujja N, Luzze H, Sebuwufu D, Ogwal-Okeng J, et al. Influence of efavirenz pharmacokinetics and pharmacogenetics on neuropsychological disorders in Ugandan HIV-positive patients with or without tuberculosis: a prospective cohort study. *BMC infectious diseases*. 2013; 13:261. doi: [10.1186/1471-2334-13-261](https://doi.org/10.1186/1471-2334-13-261) PMID: [23734829](https://pubmed.ncbi.nlm.nih.gov/23734829/); PubMed Central PMCID: PMC3680019.
8. Ward BA, Gorski JC, Jones DR, Hall SD, Flockhart DA, Desta Z. The cytochrome P450 2B6 (CYP2B6) is the main catalyst of efavirenz primary and secondary metabolism: implication for HIV/AIDS therapy and utility of efavirenz as a substrate marker of CYP2B6 catalytic activity. *J Pharmacol Exp Ther*. 2003; 306(1):287–300. PMID: [12676886](https://pubmed.ncbi.nlm.nih.gov/12676886/).
9. Guan S, Huang M, Chan E, Chen X, Duan W, Zhou SF. Genetic polymorphisms of cytochrome P450 2B6 gene in Han Chinese. *European journal of pharmaceutical sciences: official journal of the European Federation for Pharmaceutical Sciences*. 2006; 29(1):14–21. doi: [10.1016/j.ejps.2006.04.004](https://doi.org/10.1016/j.ejps.2006.04.004) PMID: [16815693](https://pubmed.ncbi.nlm.nih.gov/16815693/).
10. Guan S, Huang M, Li X, Chen X, Chan E, Zhou SF. Intra- and inter-ethnic differences in the allele frequencies of cytochrome P450 2B6 gene in Chinese. *Pharm Res*. 2006; 23(9):1983–90. doi: [10.1007/s11095-006-9083-5](https://doi.org/10.1007/s11095-006-9083-5) PMID: [16951995](https://pubmed.ncbi.nlm.nih.gov/16951995/).

11. To KW, Liu ST, Cheung SW, Chan DP, Chan RC, Lee SS. Pharmacokinetics of plasma efavirenz and CYP2B6 polymorphism in southern Chinese. *Therapeutic drug monitoring*. 2009; 31(4):527–30. doi: [10.1097/FTD.0b013e3181ad74a4](https://doi.org/10.1097/FTD.0b013e3181ad74a4) PMID: [19531981](https://pubmed.ncbi.nlm.nih.gov/19531981/).
12. Xu BY, Guo LP, Lee SS, Dong QM, Tan Y, Yao H, et al. Genetic variability of CYP2B6 polymorphisms in four southern Chinese populations. *World journal of gastroenterology: WJG*. 2007; 13(14):2100–3. PMID: [17465455](https://pubmed.ncbi.nlm.nih.gov/17465455/); PubMed Central PMCID: PMC4319132.
13. Desta Z, Saussele T, Ward B, Blievernicht J, Li L, Klein K, et al. Impact of CYP2B6 polymorphism on hepatic efavirenz metabolism in vitro. *Pharmacogenomics*. 2007; 8(6):547–58. doi: [10.2217/14622416.8.6.547](https://doi.org/10.2217/14622416.8.6.547) PMID: [17559344](https://pubmed.ncbi.nlm.nih.gov/17559344/).
14. Nyakutira C, Roshammar D, Chigutsa E, Chonzi P, Ashton M, Nhachi C, et al. High prevalence of the CYP2B6 516G→T(\*6) variant and effect on the population pharmacokinetics of efavirenz in HIV/AIDS outpatients in Zimbabwe. *European journal of clinical pharmacology*. 2008; 64(4):357–65. doi: [10.1007/s00228-007-0412-3](https://doi.org/10.1007/s00228-007-0412-3) PMID: [18057928](https://pubmed.ncbi.nlm.nih.gov/18057928/).
15. Arenaz I, Vicente J, Fanlo A, Vasquez P, Medina JC, Conde B, et al. Haplotype structure and allele frequencies of CYP2B6 in Spaniards and Central Americans. *Fundam Clin Pharmacol*. 2010; 24(2): 247–53. doi: [10.1111/j.1472-8206.2009.00753.x](https://doi.org/10.1111/j.1472-8206.2009.00753.x) PMID: [19682083](https://pubmed.ncbi.nlm.nih.gov/19682083/).
16. Haas DW, Ribaudo HJ, Kim RB, Tierney C, Wilkinson GR, Gulick RM, et al. Pharmacogenetics of efavirenz and central nervous system side effects: an Adult AIDS Clinical Trials Group study. *Aids*. 2004; 18(18):2391–400. Epub 2004/12/29. doi: [00002030-200412030-00006](https://doi.org/00002030-200412030-00006) [pii]. PMID: [15622315](https://pubmed.ncbi.nlm.nih.gov/15622315/).
17. Maimbo M, Kiyotani K, Mushiroda T, Masimirembwa C, Nakamura Y. CYP2B6 genotype is a strong predictor of systemic exposure to efavirenz in HIV-infected Zimbabweans. *European journal of clinical pharmacology*. 2012; 68(3):267–71. doi: [10.1007/s00228-011-1118-0](https://doi.org/10.1007/s00228-011-1118-0) PMID: [21901344](https://pubmed.ncbi.nlm.nih.gov/21901344/).
18. Mukonzo JK, Roshammar D, Waako P, Andersson M, Fukasawa T, Milani L, et al. A novel polymorphism in ABCB1 gene, CYP2B6\*6 and sex predict single-dose efavirenz population pharmacokinetics in Ugandans. *British journal of clinical pharmacology*. 2009; 68(5):690–9. doi: [10.1111/j.1365-2125.2009.03516.x](https://doi.org/10.1111/j.1365-2125.2009.03516.x) PMID: [19916993](https://pubmed.ncbi.nlm.nih.gov/19916993/); PubMed Central PMCID: PMC2791975.
19. Ngaimisi E, Habtewold A, Minzi O, Makonnen E, Mugusi S, Amogne W, et al. Importance of ethnicity, CYP2B6 and ABCB1 genotype for efavirenz pharmacokinetics and treatment outcomes: a parallel-group prospective cohort study in two sub-Saharan Africa populations. *PLoS one*. 2013; 8(7):e67946. doi: [10.1371/journal.pone.0067946](https://doi.org/10.1371/journal.pone.0067946) PMID: [23861838](https://pubmed.ncbi.nlm.nih.gov/23861838/); PubMed Central PMCID: PMC3702506.
20. Ribaudo HJ, Liu H, Schwab M, Schaeffeler E, Eichelbaum M, Motsinger-Reif AA, et al. Effect of CYP2B6, ABCB1, and CYP3A5 polymorphisms on efavirenz pharmacokinetics and treatment response: an AIDS Clinical Trials Group study. *The Journal of infectious diseases*. 2010; 202(5):717–22. Epub 2010/07/29. doi: [10.1086/655470](https://doi.org/10.1086/655470) PMID: [20662624](https://pubmed.ncbi.nlm.nih.gov/20662624/); PubMed Central PMCID: PMC2919241.
21. Wyen C, Hendra H, Vogel M, Hoffmann C, Knechten H, Brockmeyer NH, et al. Impact of CYP2B6 983T>C polymorphism on non-nucleoside reverse transcriptase inhibitor plasma concentrations in HIV-infected patients. *The Journal of antimicrobial chemotherapy*. 2008; 61(4):914–8. Epub 2008/02/19. doi: [10.1093/jac/dkn029](https://doi.org/10.1093/jac/dkn029) PMID: [18281305](https://pubmed.ncbi.nlm.nih.gov/18281305/).
22. Carr DF, la Porte CJ, Pirmohamed M, Owen A, Cortes CP. Haplotype structure of CYP2B6 and association with plasma efavirenz concentrations in a Chilean HIV cohort. *The Journal of antimicrobial chemotherapy*. 2010; 65(9):1889–93. doi: [10.1093/jac/dkq260](https://doi.org/10.1093/jac/dkq260) PMID: [20639527](https://pubmed.ncbi.nlm.nih.gov/20639527/); PubMed Central PMCID: PMC2920179.
23. Cho JY, Lim HS, Chung JY, Yu KS, Kim JR, Shin SG, et al. Haplotype structure and allele frequencies of CYP2B6 in a Korean population. *Drug Metab Dispos*. 2004; 32(12):1341–4. doi: [10.1124/dmd.104.001107](https://doi.org/10.1124/dmd.104.001107) PMID: [15383491](https://pubmed.ncbi.nlm.nih.gov/15383491/).
24. Chen J, Sun J, Ma Q, Yao Y, Wang Z, Zhang L, et al. CYP2B6 polymorphism and nonnucleoside reverse transcriptase inhibitor plasma concentrations in Chinese HIV-infected patients. *Therapeutic drug monitoring*. 2010; 32(5):573–8. Epub 2010/07/14. doi: [10.1097/FTD.0b013e3181ea953c](https://doi.org/10.1097/FTD.0b013e3181ea953c) PMID: [20625352](https://pubmed.ncbi.nlm.nih.gov/20625352/).
25. Sun J, Chen J, Yao Y, Zhang R, Zheng Y, Liu L, et al. Minimum effective plasma concentration of efavirenz in treatment-naive Chinese HIV-infected patients. *Int J STD AIDS*. 2010; 21(12):810–3. doi: [10.1258/ijsa.2010.010114](https://doi.org/10.1258/ijsa.2010.010114) PMID: [21297088](https://pubmed.ncbi.nlm.nih.gov/21297088/).
26. Donnerer J, Kronawetter M, Kapper A, Haas I, Kessler HH. Therapeutic drug monitoring of the HIV/AIDS drugs abacavir, zidovudine, efavirenz, nevirapine, indinavir, lopinavir, and nelfinavir. *Pharmacology*. 2003; 69(4):197–204. doi: [10.1159/00009060](https://doi.org/10.1159/00009060) PMID: [14624060](https://pubmed.ncbi.nlm.nih.gov/14624060/).
27. Villani P, Pregnolato M, Banfo S, Rettani M, Burrioni D, Seminari E, et al. High-performance liquid chromatography method for analyzing the antiretroviral agent efavirenz in human plasma. *Therapeutic drug monitoring*. 1999; 21(3):346–50. PMID: [10365651](https://pubmed.ncbi.nlm.nih.gov/10365651/).
28. Barrett JC, Fry B, Maller J, Daly MJ. Haploview: analysis and visualization of LD and haplotype maps. *Bioinformatics*. 2005; 21(2):263–5. doi: [10.1093/bioinformatics/bth457](https://doi.org/10.1093/bioinformatics/bth457) PMID: [15297300](https://pubmed.ncbi.nlm.nih.gov/15297300/).

29. Kwara A, Lartey M, Sagoe KW, Rzek NL, Court MH. CYP2B6 (c.516G→T) and CYP2A6 (\*9B and/or \*17) polymorphisms are independent predictors of efavirenz plasma concentrations in HIV-infected patients. *British journal of clinical pharmacology*. 2009; 67(4):427–36. doi: [10.1111/j.1365-2125.2009.03368.x](https://doi.org/10.1111/j.1365-2125.2009.03368.x) PMID: [19371316](https://pubmed.ncbi.nlm.nih.gov/19371316/); PubMed Central PMCID: PMC2679106.
30. Ramachandran G, Hemanth Kumar AK, Rajasekaran S, Kumar P, Ramesh K, Anitha S, et al. CYP2B6 G516T polymorphism but not rifampin coadministration influences steady-state pharmacokinetics of efavirenz in human immunodeficiency virus-infected patients in South India. *Antimicrob Agents Chemother*. 2009; 53(3):863–8. doi: [10.1128/AAC.00899-08](https://doi.org/10.1128/AAC.00899-08) PMID: [19124658](https://pubmed.ncbi.nlm.nih.gov/19124658/); PubMed Central PMCID: PMC2650539.
31. Rotger M, Tegude H, Colombo S, Cavassini M, Furrer H, Decosterd L, et al. Predictive Value of Known and Novel Alleles of CYP2B6 for Efavirenz Plasma Concentrations in HIV-infected Individuals. *Clin Pharmacol Ther*. 2007; 81(4):557–66. PMID: [17235330](https://pubmed.ncbi.nlm.nih.gov/17235330/).
32. Tsuchiya K, Gatanaga H, Tachikawa N, Teruya K, Kikuchi Y, Yoshino M, et al. Homozygous CYP2B6 \*6 (Q172H and K262R) correlates with high plasma efavirenz concentrations in HIV-1 patients treated with standard efavirenz-containing regimens. *Biochem Biophys Res Commun*. 2004; 319(4):1322–6. PMID: [15194512](https://pubmed.ncbi.nlm.nih.gov/15194512/).
33. Rodriguez-Novoa S, Barreiro P, Rendon A, Jimenez-Nacher I, Gonzalez-Lahoz J, Soriano V. Influence of 516G>T polymorphisms at the gene encoding the CYP450-2B6 isoenzyme on efavirenz plasma concentrations in HIV-infected subjects. *Clin Infect Dis*. 2005; 40(9):1358–61. doi: [10.1086/429327](https://doi.org/10.1086/429327) PMID: [15825040](https://pubmed.ncbi.nlm.nih.gov/15825040/).
34. Hiratsuka M, Takekuma Y, Endo N, Narahara K, Hamdy SI, Kishikawa Y, et al. Allele and genotype frequencies of CYP2B6 and CYP3A5 in the Japanese population. *European journal of clinical pharmacology*. 2002; 58(6):417–21. doi: [10.1007/s00228-002-0499-5](https://doi.org/10.1007/s00228-002-0499-5) PMID: [12242601](https://pubmed.ncbi.nlm.nih.gov/12242601/).
35. Lee KY, Lin SW, Sun HY, Kuo CH, Tsai MS, Wu BR, et al. Therapeutic drug monitoring and pharmacogenetic study of HIV-infected ethnic Chinese receiving efavirenz-containing antiretroviral therapy with or without rifampicin-based anti-tuberculous therapy. *PloS one*. 2014; 9(2):e88497. doi: [10.1371/journal.pone.0088497](https://doi.org/10.1371/journal.pone.0088497) PMID: [24551111](https://pubmed.ncbi.nlm.nih.gov/24551111/); PubMed Central PMCID: PMC3925114.
36. Johnson DH, Gebretsadik T, Shintani A, Mayo G, Acosta EP, Stein CM, et al. Neuropsychometric correlates of efavirenz pharmacokinetics and pharmacogenetics following a single oral dose. *British journal of clinical pharmacology*. 2013; 75(4):997–1006. doi: [10.1111/j.1365-2125.2012.04454.x](https://doi.org/10.1111/j.1365-2125.2012.04454.x) PMID: [22957905](https://pubmed.ncbi.nlm.nih.gov/22957905/); PubMed Central PMCID: PMC3612718.
37. Rotger M, Telenti A. Optimizing efavirenz treatment: CYP2B6 genotyping or therapeutic drug monitoring? *European journal of clinical pharmacology*. 2008; 64(4):335–6. doi: [10.1007/s00228-007-0440-z](https://doi.org/10.1007/s00228-007-0440-z) PMID: [18188549](https://pubmed.ncbi.nlm.nih.gov/18188549/).
38. Solas C, Gagnieu MC, roupe Suivi Therapeutique Pharmacologique de la Societe Francaise de Pharmacologie et de T. [Evidence-based therapeutic drug monitoring for efavirenz]. *Therapie*. 2011; 66(3):197–205. doi: [10.2515/therapie/2011033](https://doi.org/10.2515/therapie/2011033) PMID: [21819803](https://pubmed.ncbi.nlm.nih.gov/21819803/).
